# Supplementary material
Source: PubMed Central journal article supplement (PMC3843999)
Supplement: NIHMS512484-supplement-01.pdf [file NIHMS512484-supplement-01.pdf]

# **APPENDIX**

## **TABLE OF CONTENT**

### **APPENDIX A**

eTACTS: Vocabulary of Eligibility Tags for Clinical Trial Search  
page 2

### **APPENDIX B**

Conditions for eTACTS Result Filtering Evaluation  
page 8

### **APPENDIX C**

Conditions and Locations for eTACTS Result Diversity Evaluation  
page 10

### **APPENDIX D**

Survey Provided to the User Study Participants for Clinical Trial Search Evaluation  
page 11

## APPENDIX A

### eTACTS: Vocabulary of Eligibility Tags for Clinical Trial Search

Vocabulary of eligibility tags used in the eTACTS evaluation described in Section 2.3 (i.e., “Evaluation Design”) of the article. The vocabulary was obtained by mining eligibility tags on 65,000 clinical trials randomly sampled from ClinicalTrials.gov, with tags that had to appear in at least 2% of the trials (i.e., 1,300 trials) to be considered as frequent.

1. active peptic ulcer
2. acute coronary syndrome
3. acute myocardial infarction
4. adrenal cortex hormones
5. adverse event associated with death
6. alanine transaminase
7. alcohol abuse
8. alcoholic intoxication chronic
9. alkaline phosphatase
10. amenorrhea
11. anaphylaxis
12. anaplastic oligodendroglioma
13. anemia
14. angina pectoris
15. angina unstable
16. angiogram
17. anticoagulation therapy
18. antidepressive agents
19. antipsychotic agents
20. antiretroviral therapy
21. anxiety disorders
22. arteriopathic disease
23. ascites
24. aspirin
25. asthma
26. atrial fibrillation
27. bipolar disorder
28. bleeding tendency
29. blood coagulation disorders
30. blood transfusion
31. body mass index
32. body weight decreased
33. bone marrow transplantation
34. bone metastases
35. brain injuries
36. brain neoplasms
37. breast carcinoma
38. cancer remission
39. cancer therapeutic procedure
40. carcinoma in situ
41. carcinoma of lung
42. cardiac arrhythmia

43. cardiac surgery procedures
44. cardiomyopathies
45. cardiovascular diseases
46. cataract adverse event
47. cerebrovascular accident
48. cerebrovascular disorders
49. cervix carcinoma
50. chemotherapy adjuvant
51. chemotherapy regimen
52. chronic disease
53. chronic liver disease
54. chronic obstructive airway disease
55. cirrhosis
56. claustrophobia
57. cns disorder
58. cns metastases
59. cognitive therapy
60. colonic diseases
61. communicable diseases
62. congenital abnormality
63. congestive heart failure
64. consciousness related finding
65. contraception barrier
66. contraceptives oral
67. coronary artery bypass surgery
68. coronary artery disease
69. coronary heart disease
70. craniocerebral trauma
71. creatinine clearance
72. crohn disease
73. cytotoxic chemotherapy
74. deep vein thrombosis
75. degenerative polyarthritis
76. dementia
77. dental caries
78. depressed mood
79. dexamethasone
80. diabetes mellitus
81. diabetes mellitus insulin-dependent
82. diabetes mellitus non-insulin-dependent
83. diarrhea
84. diastolic blood pressure
85. disability
86. disease of diaphragm
87. disease susceptibility
88. drug abuse
89. drug allergy
90. drug dependence
91. dyspnea
92. eating disorders
93. ecog performance status

94. electrocorticogram
95. epilepsy
96. evaluable disease
97. fever
98. finding of creatinine level
99. finding of platelet count
100. gastrointestinal diseases
101. gastrointestinal hemorrhage
102. gentamicins
103. gonadotropins
104. hearing examination finding
105. heart diseases
106. heart function
107. hematocrit level
108. hematological disease
109. hemodialysis
110. hemoglobin
111. hemorrhage
112. hepatitis active
113. hepatitis b
114. hepatitis c
115. hepatitis chronic
116. hiv
117. hiv infections
118. hiv negative finding
119. hiv seropositivity
120. hormone replacement therapy
121. human chorionic gonadotropin
122. hypertensive disease
123. hyperthyroidism
124. hypotension
125. hypothyroidism
126. hysterectomy
127. immunologic deficiency syndromes
128. immunosuppressive agents
129. immunotherapy
130. impaired cognition
131. implantation procedure
132. infantile neuroaxonal dystrophy
133. inflammatory bowel diseases
134. inflammatory disorder
135. integrated neuromusculoskeletal release
136. intestinal diseases
137. intestinal obstruction
138. intravenous infusion procedures
139. investigational new drugs
140. karnofsky performance status
141. kidney diseases
142. kidney failure
143. kidney failure chronic
144. laboratory abnormalities

145. left ventricular ejection fraction
146. leukemia myelocytic acute
147. liver carcinoma
148. liver cirrhosis
149. liver diseases
150. liver dysfunction
151. liver failure
152. liver function
153. liver metastases
154. lung diseases
155. lung diseases obstructive
156. lupus erythematosus systemic
157. lupus vulgaris
158. lymphoid leukemia
159. lymphoma
160. magnetic resonance imaging
161. major depressive disorder
162. major surgery
163. malignant disease
164. malignant neoplasm of skin
165. mental disorders
166. mental retardation
167. metabolic diseases
168. metastatic malignant neoplasm to brain
169. migraine disorders
170. monoamine oxidase inhibitors
171. morphology within normal limits
172. morular metaplasia of the endometrium
173. multiple endocrine neoplasia
174. multiple myeloma
175. mycoses
176. myeloid leukemia chronic
177. myocardial infarction
178. myocardial ischemia
179. neoadjuvant therapy
180. neoplasm metastasis
181. nervous system disorder
182. nitrosourea compounds
183. non-small cell lung carcinoma
184. non-smoker
185. obesity
186. operative surgical procedures
187. oral contraception
188. osteoporosis
189. ovariectomy
190. parkinson disease
191. peptic ulcer
192. percutaneous coronary intervention
193. peripheral neuropathy
194. peripheral vascular diseases
195. pharmaceutical adjuvants

196. phosphatidylinositols  
197. phosphoric monoester hydrolases  
198. plain x-ray  
199. platelets adverse event  
200. positive pregnancy test  
201. positron-emission tomography  
202. prednisone  
203. pregnancy test negative  
204. pregnant  
205. prior chemotherapy  
206. progressive disease  
207. prophylactic treatment  
208. prostate carcinoma  
209. psychotic disorders  
210. pulmonary embolism  
211. pulmonary fibrosis  
212. radionuclide ventriculogram scan  
213. recurrent malignant neoplasm  
214. renal dialysis  
215. renal dysfunction  
216. renal impairment  
217. renal insufficiency  
218. respiration disorders  
219. respiratory tract infections  
220. retinal diseases  
221. rheumatoid arthritis  
222. schizoaffective disorder  
223. schizophrenia  
224. septicemia  
225. serum creatinine level  
226. sexual sterilization  
227. skin carcinoma  
228. sleep apnea syndromes  
229. smoker  
230. solid tumor  
231. squamous cell carcinoma of skin  
232. stem cell transplant  
233. stenosis unspecified  
234. steroid therapy  
235. stimulation procedure  
236. substance abuse problem  
237. substance dependence  
238. suicide attempt  
239. systolic blood pressure measurement  
240. tachycardia ventricular  
241. therapeutic immunosuppression  
242. thrombocytopenia  
243. thyroid diseases  
244. tissue growth  
245. transient ischemic attack  
246. transplantation

- 247. traumatic brain injury
- 248. tubal ligation
- 249. tuberculosis
- 250. ulcer
- 251. ulcerative colitis
- 252. ultrasonography
- 253. uncontrolled hypertensive disease
- 254. unipolar depression
- 255. vasectomy
- 256. venous thrombosis
- 257. ventricular arrhythmia
- 258. visual acuity
- 259. weighing patient
- 260. x-ray computed tomography

## APPENDIX B

### Conditions for eTACTS Result Filtering Evaluation

List of the 50 conditions used as queries in the eTACTS result filtering evaluation described in Section 2.3.1 (i.e., “Reduction of the Result List”) of the article. Each condition is provided with the number of clinical trials associated on ClinicalTrials.gov as of April 2013.

| <b>Condition</b>                   | <b>No. of Clinical Trials</b> |
|------------------------------------|-------------------------------|
| acquired immunodeficiency syndrome | 4,828                         |
| adnexal diseases                   | 1,718                         |
| anxiety disorders                  | 1,846                         |
| arteriosclerosis                   | 3,461                         |
| arthritis                          | 3,241                         |
| bone diseases                      | 5,670                         |
| brain ischemia                     | 1,449                         |
| breast cancer                      | 4,822                         |
| bronchial diseases                 | 4,938                         |
| bronchial neoplasms                | 2,540                         |
| central nervous system diseases    | 10,438                        |
| cerebrovascular disorders          | 2,164                         |
| cervical cancer                    | 2,916                         |
| colon cancer                       | 2,345                         |
| colorectal neoplasms               | 2,650                         |
| congenital abnormalities           | 2,487                         |
| coronary diseases                  | 9,546                         |
| depression                         | 3,039                         |
| diabetes mellitus, type 2          | 4,015                         |
| digestive system neoplasms         | 6,671                         |
| endocrine system diseases          | 10,987                        |
| eye diseases                       | 4,649                         |
| fibrosis                           | 1,744                         |
| gastrointestinal diseases          | 13,687                        |
| genetic diseases                   | 5,307                         |
| genital diseases, female           | 3,782                         |
| genital diseases, male             | 3,682                         |



|                               |       |
|-------------------------------|-------|
| gonadal disorders             | 1,963 |
| heart diseases                | 9,511 |
| hemorrhagic disorders         | 2,428 |
| hemostatic disorders          | 2,430 |
| hepatitis a                   | 2,083 |
| hiv infections                | 4,827 |
| hypertensive diseases         | 4,106 |
| immunoproliferative disorders | 5,291 |
| infant newborn diseases       | 1,524 |
| intestinal neoplasms          | 2,868 |
| kidney diseases               | 4,718 |
| leukemia                      | 3,740 |
| liver diseases                | 4,481 |
| lymphoma, non-hodgkin         | 2,445 |
| ovarian cancer                | 1,739 |
| prostatic diseases            | 2,552 |
| renal insufficiency           | 2,114 |
| retroviridae infections       | 3,927 |
| rheumatic diseases            | 3,163 |
| sexually transmitted diseases | 4,112 |
| skin diseases                 | 9,159 |
| urologic diseases             | 5,456 |
| virus diseases                | 9,001 |

## APPENDIX C

### Conditions and Locations for eTACTS Result Diversity Evaluation

List of the 10 conditions and 10 locations for the term-combined queries (i.e., all the 100 combinations: “condition” AND “location”) used in the eTACTS evaluation described in Section 2.3.2 (i.e., “Diversity of the Filtered Results”) of the article. The conditions are extracted from the list provided in **Appendix B**.

#### **Conditions:**

1. breast cancer
2. depression
3. diabetes mellitus, type 2
4. digestive system neoplasms
5. hiv infections
6. hypersensitivity
7. hypertension
8. intestinal neoplasms
9. kidney disease
10. leukemia

#### **Locations:**

1. California
2. France
3. Germany
4. Italy
5. Massachusetts
6. New York
7. Ohio
8. Spain
9. Texas
10. United Kingdom

## APPENDIX D

### Survey Provided to the User Study Participants for Clinical Trial Search Evaluation

Survey provided to the participants at the end of the user-based evaluation described in Section 2.3.3 (i.e., “A Scenario-based User Study Comparing Multiple Clinical Trial Search Engines”) of the article. During the evaluation tasks, participants were also required to manually review the top five ranked clinical trials returned by each search engine to determine if the assigned patient medical profile was eligible. Since this part was performed during the evaluation process, it is not reported in the survey.

---

**Participant:** \_\_\_\_\_

---

#### Clinical Trial Search Experience Background:

---

1. I have searched for clinical trials before today.  
*true false*
2. Previously, I had trouble finding clinical trials without the help of another person.  
*strongly disagree disagree agree strongly agree n/a*
3. It is important for me to be able to find clinical trials on my own.  
*strongly disagree disagree neutral agree strongly agree*
4. In general, I feel it is important to participate in clinical trials.  
*strongly disagree disagree neutral agree strongly agree*
5. I usually have an idea of the clinical trial(s) I want to participate in before searching.  
*strongly disagree disagree agree strongly agree n/a*

---

#### Comparison between Clinical Trial Search Engine

---

6. One or more of the systems I used today helped me find more trials that I qualified for.  
*strongly disagree disagree neutral agree strongly agree*
  7. One or more of the systems I used today helped me find relevant trials quicker.  
*strongly disagree disagree neutral agree strongly agree*
-

---

8. Please rank the systems based on ease of entering information (i.e., selecting tags, entering data into medical profiles, etc.); [1 = best, 6 = worst, ties are allowed].

*ASCOT*       *ClinicalTrials.gov*       *Corengi*  
 *eTACTS*       *PatientsLikeMe*

9. Please rank the systems by the amount of search guidance offered by the search engine; [1 = most, 6 = least, ties are allowed].

*ASCOT*       *ClinicalTrials.gov*       *Corengi*  
 *eTACTS*       *PatientsLikeMe*

10. Please rank the systems based on ease of site navigation (for example: transitioning from one result to another or finding elements to complete tasks); [1 = best, 6 = worst, ties are allowed].

*ASCOT*       *ClinicalTrials.gov*       *Corengi*  
 *eTACTS*       *PatientsLikeMe*

11. Please rank the systems based on ease of use without prior training or instructions; [1 = best, 6 = worst, ties are allowed].

*ASCOT*       *ClinicalTrials.gov*       *Corengi*  
 *eTACTS*       *PatientsLikeMe*

12. Please rank the systems based on overall ease of use; [1 = best, 6 = worst, ties are allowed].

*ASCOT*       *ClinicalTrials.gov*       *Corengi*  
 *eTACTS*       *PatientsLikeMe*

13. Which system provided a better tag-cloud search refinement tool? (Check mark).

*ASCOT*       *eTACTS*       *neither*

14. Which system provided more tag-cloud terms related to your disease? (Check mark).

*ASCOT*       *eTACTS*       *neither*

15. Which system was easier to fill out a medical profile? (Check mark).

*Corengi*       *PatientsLikeMe*       *neither*

16. Please rank the following methods of searching for clinical trials; [1 = best, 3 = worst, ties are allowed].

*simple search (i.e., clinicaltrials.gov)*  
 *tag-cloud search (i.e., ASCOT, eTACTS)*  
 *online profile matching (i.e., Corengi, PatientsLikeMe)*

---
